# Supplementary material for: Immunogenicity of Non-Living Anthrax Vaccine Candidates in Cattle and Protective Efficacy of Immune Sera in A/J Mouse Model Compared to the Sterne Live Spore Vaccine
Source: MDPI journal article supplement (doi:10.3390/pathogens9070557), 2020-07-10
Supplement: s1 [file s1]

## Supplementary Materials

### Supplementary material 1: Purified and crude rPA calculation for vaccine formulation

The vaccine formulation for the purified and crude rPA was calculated using:

$$C1V1 = C2V2.$$

$C1$  = Primary concentration

$V1$  = Primary volume

$C2$  = Final concentration

$V2$  = Final concentration

The concentration of the CrPA used for the vaccine formulation was determined with the 1 ml volume of the supernatant of the lysed cells after discarding the pellets following centrifugation. The formulas used to determine the rPA concentration in the crude whole supernatant are:

$$tx\ concn = wl\ concn - PrPA\ concn$$

$$ubrPA\ concn = tx\ concn - ft\ concn$$

$$CrPA\ concn = ubrPA + PrPA\ concn$$

$tx\ concn$  = Total protein concentration without the purified rPA concentration

$wl\ concn$  = Whole protein concentration in supernatant after centrifugation

$PrPA\ concn$  = Purified rPA concentration after purification using Ni-TED column (Machery-Nagel, England)

$ubrPA\ concn$  = Concentration of unbind rPA concentration present in the flow through after passing the whole supernatant the Ni-TED column (Machery-Nagel, England).

$ft\ concn$  = Concentration of the all proteins present in the flow through Ni-TED column.

$CrPA\ concn$  = Concentration of rPA in the whole supernatant after centrifugation.

The CrPA vaccine was formulated as described for the PrPA vaccine formulation.
